# Supplementary material for: Feeder-free differentiation of cells exhibiting characteristics of corneal endothelium from human induced pluripotent stem cells
Source: PubMed Central journal article supplement (PMC5992532; doi:10.1242/bio.032102), 2018-04-23
Supplement: biolopen-7-032102-s1.pdf [file biolopen-7-032102-s1.pdf]

## Supplemental Data

## Supplemental Figure 1

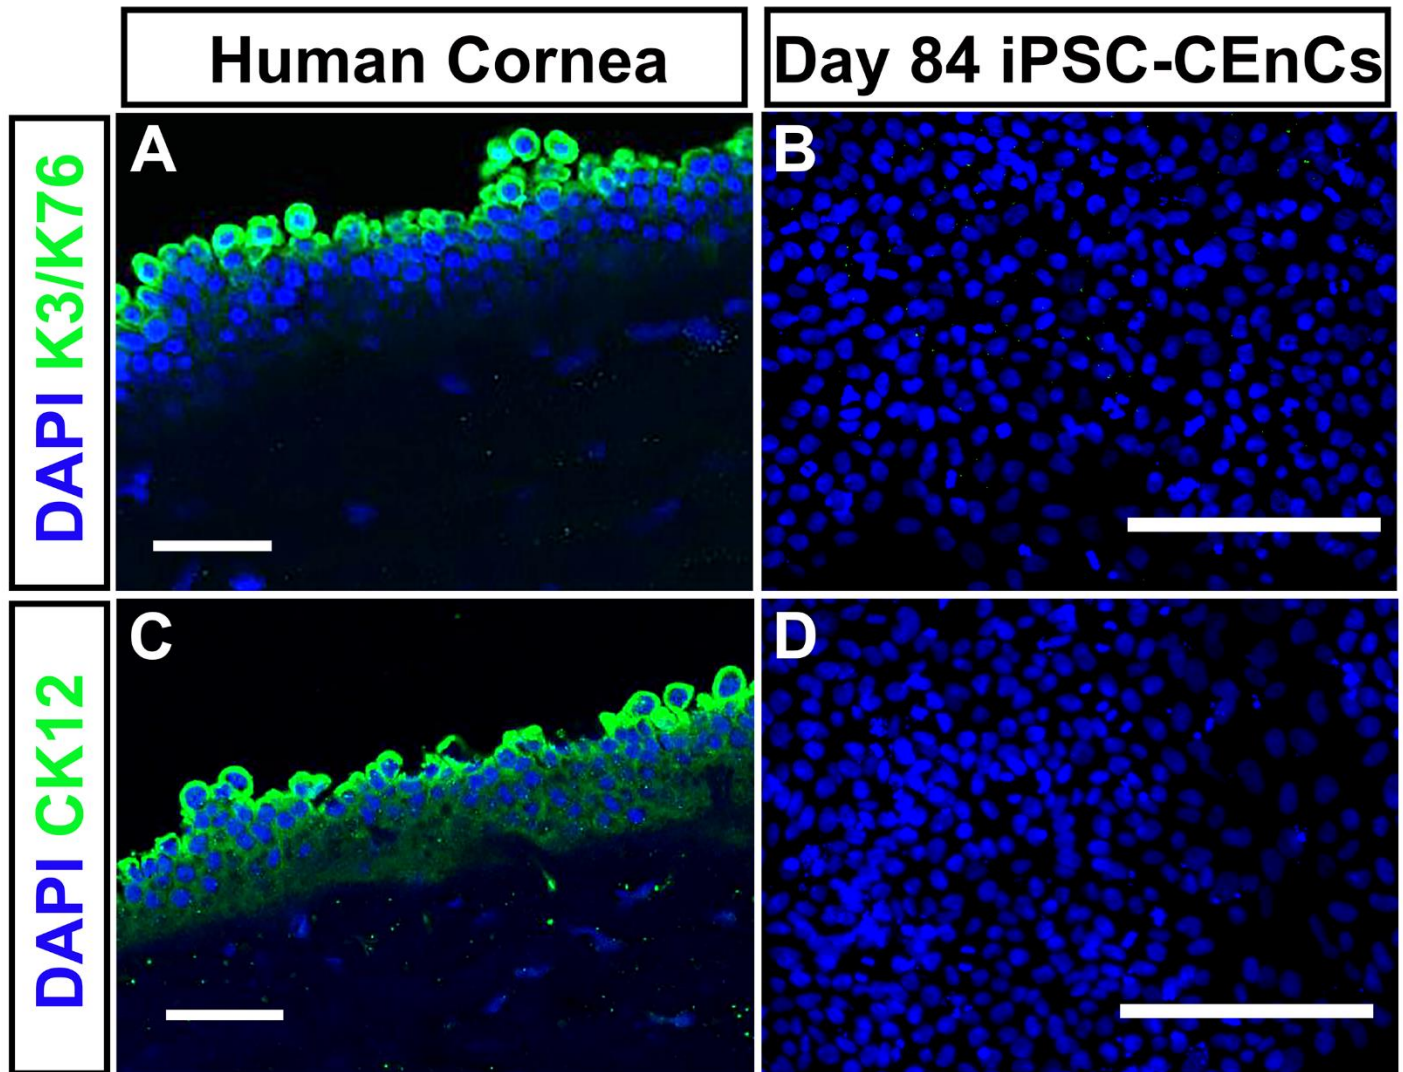

**Supplemental Figure 1: iPSC-derived CEnCs do not express markers specific to the corneal epithelium.** A-D) Representative immunocytochemical labeling of sections of human cornea (A, C) and Day 84 iPSC-derived CEnCs (B, D) with antibodies against the corneal epithelial-specific markers, keratin 3/keratin 76 (A-B; K3/K76; green) and cytokeratin 12 (C-D; CK12; green). DAPI was used to counterstain cell nuclei. Scale bars = 50  $\mu\text{m}$  in A, C and 200  $\mu\text{m}$  in B, D.
